# Supplementary material
Source: PubMed Central journal article supplement (PMC4539949)
Supplement: NIHMS710682-supplement-complete_title_page.pdf [file NIHMS710682-supplement-complete_title_page.pdf]

# **Mitochondria-targeted anti-aging gene therapy with adeno-associated viral vectors**

Running title: Gene therapy for aging

**Dejia Li<sup>1</sup>, Dongsheng Duan<sup>2</sup>**

<sup>1</sup>Department of Occupational Environmental Health

School of Public Health, Wuhan University, Wuhan, People's Republic of China

<sup>2</sup>Department of Molecular Microbiology and Immunology,

School of Medicine, The University of Missouri, Columbia, MO USA

Corresponding address:

Dongsheng Duan Ph.D.

Professor

Department of Molecular Microbiology and Immunology

1 Hospital Drive, M610

Columbia, MO 65212

Phone: (573) 884-9584

Fax: (573) 882- 4287

e-mail: [duand@missouri.edu](mailto:duand@missouri.edu)
